# Supplementary material for: Visualizing screening in noble-metal clusters: static vs. dynamic
Source: Royal Society of Chemistry journal article supplement (doi:10.1039/d2cp04316e), 2022-12-10
Supplement: d2cp04316e1.pdf [file d2cp04316e1.pdf]

# Supplementary Material

## Visualizing Screening in Noble-Metal Clusters: Static vs. Dynamic

Rajarshi Sinha-Roy,<sup>\*,†,‡,¶,#</sup> Pablo García-González,<sup>§,#</sup> Xóchitl López Lozano,<sup>||</sup>  
and Hans-Christian Weissker<sup>\*,⊥,#</sup>

<sup>†</sup>*Aix-Marseille University, CNRS, CINAM, Marseille 13288, France*

<sup>‡</sup>*Laboratoire des Solides Irradiés, École Polytechnique, CNRS, CEA/DRF/IRAMIS,  
Institut Polytechnique de Paris, Palaiseau F-91128, France*

<sup>¶</sup>*Université de Lyon, Université Claude Bernard Lyon 1, CNRS, Institut Lumière  
Matière, F-69622, VILLEURBANNE, France.*

<sup>§</sup>*Departamento de Física Teórica de la Materia Condensada and Condensed Matter  
Physics Center (IFIMAC), Universidad Autónoma de Madrid, E-28049 Madrid, Spain*

<sup>||</sup>*Department of Physics & Astronomy, The University of Texas at San Antonio, One  
UTSA circle, 78249-0697 San Antonio, TX., USA*

<sup>⊥</sup>*Aix-Marseille Univ., CNRS, CINAM, Marseille, France.*

<sup>#</sup>*European Theoretical Spectroscopy Facility (ETSF)*

E-mail: rajarshi.sinha-roy@univ-lyon1.fr; hans-christian.weissker@univ-amu.fr

## Comparison of functionals

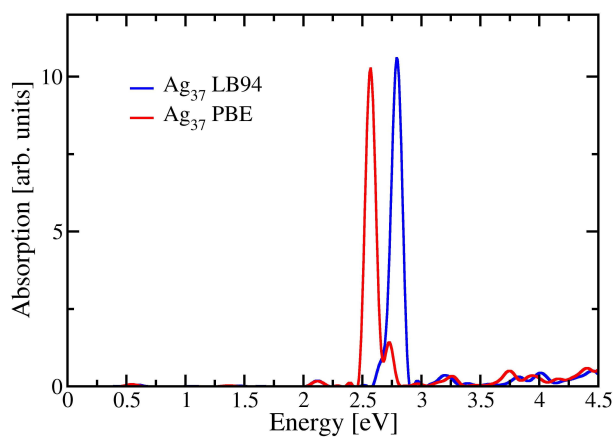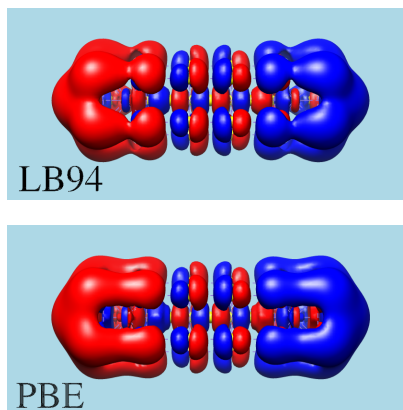

**Supplementary Figure S1.** LHS: Optical absorption spectra of a 37-atom silver rod comparing PBE as used in the article with the long-range-corrected LB94. Apart from the well-known blue-shift of the SPR with LB94,<sup>1</sup> the qualitative result remains unchanged. RHS: reconstructed modes of density oscillation at the respective energies for the LB94 and the PBE calculation (maximum of the density oscillations), the iso value is  $3 \times 10^{-6}$ .

## Longer time evolutions for better resolution of modes

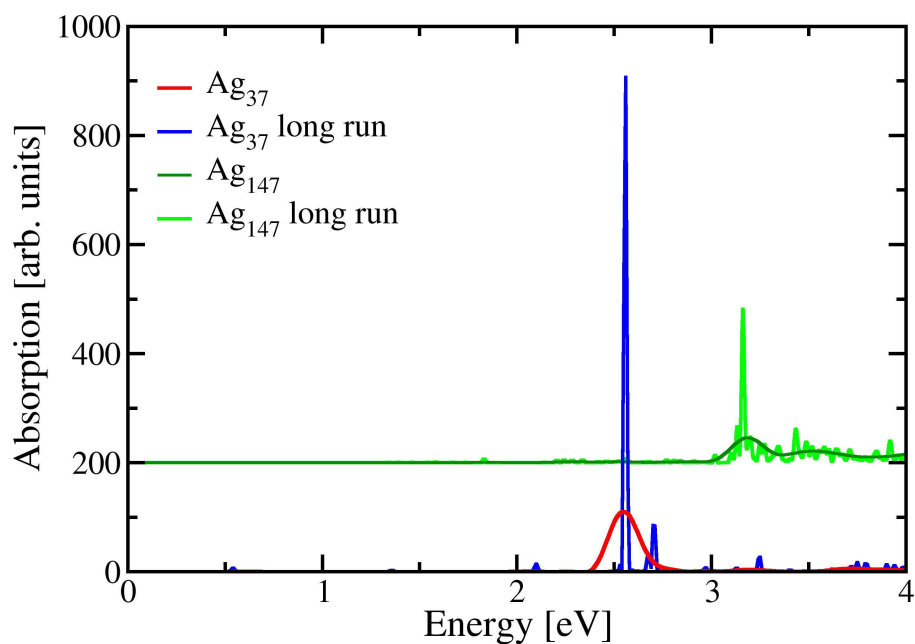

**Supplementary Figure S2.** Optical absorption spectra of a 37-atom silver rod and of the icosahedral 147-atom silver cluster. The two systems are the smaller versions of the two structures used in the present paper, the quasi-spherical icosahedral  $\text{Ag}_{309}$  and the nanorod  $\text{Ag}_{263}$ . The “normal” evolution time was 25 fs, the “long run” was 250 fs. Note that below the main peak features, only few, and very weak, absorption features are visible in all the cases.

## References

- (1) Aikens, C. M.; Li, S.; Schatz, G. C. From Discrete Electronic States to Plasmons: TDDFT Optical Absorption Properties of Ag  $n$  ( $n = 10, 20, 35, 56, 84, 120$ ) Tetrahedral Clusters. *J. Phys. Chem. C* **2008**, *112*, 11272.
